# Supplementary material
Source: Research Square preprint supplement (doi:10.21203/rs.3.rs-9069839/v1)
Supplement: Supplementary file 1 [file 1e780459948950173e64730b.docx]

**Supplements**

**Microalgae of the genus *Scenedesmus* as a feedstock for biodiesel: characterization of the fatty acid profiles of total lipid isolates and assessment of the physicochemical properties of their transesterification derivatives**

**Tables**

Table S1. Composition of microelement solutions

| Microelements 1 | | Microelements 2 | |
| --- | --- | --- | --- |
| Ingredient | Content, g·L-1 | Ingredient | Content, g·L-1 |
| H3BO3 | 2.86 | NH4VO3 | 0.023 |
| MnCl2·4H2O | 1.81 | K2Cr2 (SO4)4·24H2O | 0.096 |
| ZnSO4·7H2O | 0.22 | NiSO4·7H2O | 0.048 |
| CuSO4·5H2O | 0.08 | Na2WO4·2H2O | 0.018 |
| MoO3 | 0.015 | Ti2(SO4)3 | 0.040 |
|  |  | Co(NO3)2·6H2O | 0.044 |

Table S2. Fatty acid profile (component content, % *w/w* of total FAME) of total lipids from *S. obliquus* IPPAS S-321 strain

| Fatty acid | Retention time, min | Samples | | | |
| --- | --- | --- | --- | --- | --- |
| S-321_С1 | S-321_M1 | S-321_M2 | S-321_M3 |
| 14:0 | 21.919 | 0.2±0.02a | 0.3±0.02a | 0.2±0.02a | 0.2±0.02a |
| 16:0 | 24.599 | 24.8±1.56ab | 26.1±1.38a | 23.1±1.22b | 25.0±1.51ab |
| 16:1Δ7 | 25.140 | 0.1±0.01b | 0.1±0.01b | 0.1±0.01b | 0.1±0.01a |
| 16:1Δ9 | 25.337 | 1.3±0.07b | 1.6±0.08a | 0.6±0.04d | 1.0±0.06c |
| 16:1Δ11 | 25.420 | 0.2±0.02c | 0.1±0.03c | 1.8±0.11a | 1.0±0.06b |
| 16:1Δ13 | 25.477 | 0.2±0.02b | 0.2±0.05b | 0.7±0.04a | 0.8±0.04a |
| 16:2Δ7,10 | 26.567 | 0.6±0.04b | 1.0±0.07a | 0.3±0.02c | 0.6±0.03b |
| 16:3Δ4,7,10 | 27.133 | 0.1±0.01b | 0.1±0.01b | 0.1±0.01b | 0.2±0.02a |
| 18:0 | 27.667 | 24.2±1.57a | 21.8±1.16b | 4.5±0.25d | 8.9±0.44c |
| 16:3Δ7,10,13 | 27.964 | 1.3±0.09b | 1.9±1.02a | 1.1±0.06c | 1.2±0.07b |
| 18:1Δ9 | 28.366 | 16.5±1.08a | 16.8±0.97a | 6.7±0.41c | 8.2±0.43b |
| 18:1Δ11 | 28.459 | 0.3±0.02d | 0.4±0.04c | 0.9±0.05a | 0.7±0.04b |
| 16:4Δ4,7,10,13 | 28.534 | 5.6±0.34b | 5.1±0.31b | 11.6±0.62a | 11.2±0.67a |
| 18:2Δ9,12 | 29.448 | 3.8±0.20b | 5.7±0.34a | 5.3±0.32a | 5.5±0,29a |
| 18:3Δ6,9,12 | 30.200 | 0.1±0.02d | 0.1±0.02c | 0.4±0.03a | 0.3±0.02b |
| 20:0 | 30.333 | 1.4±0.08a | 1.0±0.06b | 0.3±0.02d | 0.6±0.04c |
| 18:3Δ9,12,15 | 30.691 | 16.6±1.07c | 15.1±0.92c | 35.8±2.21a | 30.2±1.52b |
| 20:1Δ11 | 30.946 | 0.2±0.02a | 0.1±0.02b | 0.1±0.01d | 0.1±0.01c |
| 18:4Δ6,9,12,15 | 31.419 | 1.8±0.11c | 2.0±0.11c | 5.8±0.35a | 3.6±0.22b |
| 22:0 | 32.673 | 0.4±0.02a | 0.3±0.03b | 0.3±0.02b | 0.3±0.02a,b |
| 24:0 | 34.705 | 0.1±0.01a | 0.1±0.01b | 0.1±0.01a | 0.1±0.01a |
| 26:0 | 36.540 | 0.1±0.01a | 0.1±0.01a | 0.1±0.01a | 0.1±0.01a |
| 28:0 | 38.475 | 0.2±0.02a | 0.2±0.03a | 0.2±0.02a | 0.2±0.02a |
| Total SFA (%) | | 51.3 | 49.8 | 28.7 | 35.3 |
| Total MUFA (%) | | 18.7 | 19.3 | 10.9 | 11.8 |
| Total PUFA (%) | | 30.0 | 31.0 | 60.4 | 52.9 |
| SFA:MUFA:PUFA ratio | | 2.7:1.0:1.6 | 2.6:1.0:1.6 | 2.6:1.0:5.5 | 3.0:1.0:4.5 |

SFA – saturated fatty acids; MUFA – monounsaturated fatty acids; PUFA – polyunsaturated fatty acids. In rows different letters a, b, c, d represent significant differences in the contents of individual fatty acids among the examined samples according to one-way ANOVA and the Tukey’s post-hoc test (p ≤ 0.05)

Table S3. Fatty acid profile (component content, % *w/w* of total FAME) of total lipids from *S. rubescens* IPPAS D-292 strain

| Fatty acid | | Retention time, min | Samples | | | |
| --- | --- | --- | --- | --- | --- | --- |
| D-292_С2 | D-292_M4 | D-292_M5 | D-292_M6 |
| 14:0 | | 21.919 | 0.1±0.01a,b | 0.1±0.01a,b | 0.1±0.01b | 0.1±0.01a |
| 16:0 | | 24.599 | 15.3±0.81b | 17.5±1.02a | 15.6±0.91b | 14.4±0.76b |
| 16:1Δ7 | | 25.140 | 0.1±0.01c | 0.1±0.01a | 0.1±0.02b | 0.1±0.01d |
| 16:1Δ9 | | 25.337 | 2.7±0.16a | 0.1±0.005c | 1.0±0.06b | 2.7±0.16a |
| 16:1Δ11 | | 25.420 | 0.4±0.02c | 0.8±0.04b | 1.4±0.07a | 0.1±0.02c |
| 16:1Δ13 | | 25.477 | 0.1±0.01c | 0.1±0.02b | 0.2±0.02a | 0.1±0.01c |
| 16:2Δ7,10 | | 26.567 | 2.7±0.17b | 1.7±0.11c | 1.1±0.07d | 4.2±0.22a |
| 16:3Δ4,7,10 | | 27.133 | 0.2±0.02a | 0.1±0.02ab | 0.1±0.02b | 0.2±0.02a |
| 18:0 | | 27.667 | 2.0±0.12b | 0.8±0.04c | 1.0±0.04c | 3.0±0.18a |
| 16:3Δ7,10,13 | | 27.964 | 5.7±0.29b | 6.5±0.39a | 6.2±0.33ab | 6.2±0.39ab |
| 18:1Δ9 | | 28.366 | 24.4±1.41b | 16.5±0.95c | 13.8±0.83d | 29.1±1.80a |
| 18:1Δ11 | | 28.459 | 0.7±0.04b | 1.4±0.08a | 1.1±0.07a | 0.5±0.03c |
| 16:4Δ4,7,10,13 | | 28.534 | 5.3±0.28c | 7.1±0.42b | 8.6±0.46a | 3.1±0.19d |
| 18:2Δ9,12 | | 29.448 | 12.0±0.71b | 10.5±0.63c | 10.1±0.54c | 13.8±0.83a |
| 18:3Δ6,9,12 | | 30.200 | 0.3±0.02b | 0.3±0.02b | 0.4±0.02a | 0.21±0.02c |
| 20:0 | | 30.333 | 0.3±0.03b | 0.2±0.02c | 0.2±0.02c | 0.5±0.03a |
| 18:3Δ9,12,15 | 30.691 | | 26.9±1.56b | 34.2±1.71a | 36.7±2.27a | 19.7±1.18c |
| 20:1Δ11 | 30.946 | | 0.2±0.03b | 0.1±0.01d | 0.1±0.02c | 0.4±0.02a |
| 18:4Δ6,9,12,15 | 31.419 | | 0.9±0.06c | 1.2±0.06b | 1.5±0.09a | 0.8±0.05a |
| 22:0 | 32.673 | | 0.2±0.01b | 0.1±0.01c | 0.1±0.01b | 0.3±0.02a |
| 24:0 | 34.705 | | 0.1±0.01a | 0.1±0.01a | 0.1±0.01a | 0.1±0.01a |
| 26:0 | 36.540 | | 0.1±0.01b | 0.1±0.02b | 0.1±0.01b | 0.2±0.02a |
| 28:0 | 38.475 | | 0.4±0.02c | 0.4±0.04ab | 0.4±0.03c | 0.4±0.05a |
| Total SFA (%) | | | 18.3 | 19.3 | 17.5 | 19.0 |
| Total MUFA (%) | | | 28.5 | 19.0 | 17.8 | 32.9 |
| Total PUFA (%) | | | 53.9 | 61.7 | 64.7 | 48.1 |
| SFA:MUFA:PUFA ratio | | | 1.0:1.7:2.8 | 1.0:1.0:3.2 | 1.0:1.0:3.7 | 1.0:1.7:2.5 |

SFA – saturated fatty acids; MUFA – monounsaturated fatty acids; PUFA – polyunsaturated fatty acids. In rows different letters a, b, c, d represent significant differences in the contents of individual fatty acids among the examined samples according to one-way ANOVA and the Tukey’s post-hoc test (p ≤ 0.05)
